# Supplementary material
Source: publisher figshare collection journal article supplement (https://sage.figshare.com/ndownloader/files/13237373)
Supplement: Supplementary file 1 [file 13237373]

## Supplementary files

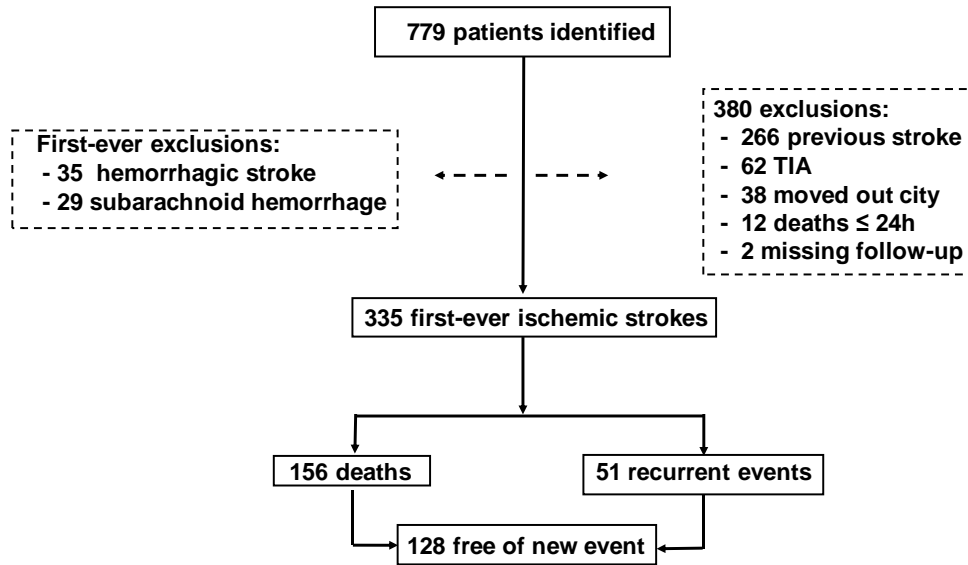

Figure S1 Flowchart of stroke recurrence or death over 5 years after first-ever ischemic stroke in 2010, Joinville, Brazil

| <b>Table S1: Work-up diagnosis according to stroke subtypes</b> |                     |                  |                |                 |                                |                                |                                 |                               |
|-----------------------------------------------------------------|---------------------|------------------|----------------|-----------------|--------------------------------|--------------------------------|---------------------------------|-------------------------------|
|                                                                 | Total<br>335 (100%) | SAD<br>113 (34%) | CE<br>91 (27%) | LAD<br>66 (20%) | UND <sub>INC</sub><br>44 (13%) | UND <sub>cryp</sub><br>14 (4%) | UND <sub>more</sub><br>1 (0.3%) | Other<br>determined<br>6 (2%) |
| Brain CT                                                        | 335 (100%)          | 113 (100%)       | 91 (100%)      | 66 (100%)       | 44 (100%)                      | 14 (100%)                      | 1 (100%)                        | 6 (100%)                      |
| Brain MRI                                                       | 67 (20%)            | 22 (19%)         | 16 (18%)       | 19 (29%)        | 2 (5%)                         | 9 (64%)                        | 0                               | 0                             |
| ECG                                                             | 335 (100%)          | 113 (100 %)      | 91 (100%)      | 66 (100%)       | 44 (100%)                      | 14 (100%)                      | 1 (100%)                        | 6 (100%)                      |
| TTE                                                             | 254 (76%)           | 98 (87%)         | 74 (81%)       | 56 (85%)        | 12 (27%)                       | 12 (86%)                       | 1 (100%)                        | 6 (100%)                      |
| TEE                                                             | 37 (11%)            | 9 (8%)           | 9 (1%)         | 13 (20%)        | 0                              | 3 (21%)                        | 0                               | 0                             |
| Holter-ECG monitoring                                           | 4 (1%)              | 1 (1%)           | 3 (3%)         | 0               | 0                              | 0                              | 0                               | 0                             |
| Carotid Doppler                                                 | 298 (89%)           | 113 (100 %)      | 91 (100%)      | 66 (100%)       | 13 (30%)                       | 14 (100%)                      | 1 (100%)                        | 6 (100%)                      |
| TCD                                                             | 136 (41%)           | 57 (50 %)        | 41 (45%)       | 29 (49%)        | 3 (7%)                         | 5 (36%)                        | 1 (100%)                        | 0                             |
| MRA                                                             | 71 (21%)            | 20 (18%)         | 14 (15%)       | 23 (35%)        | 3 (7%)                         | 7 (50%)                        | 0                               | 4 (67%)                       |

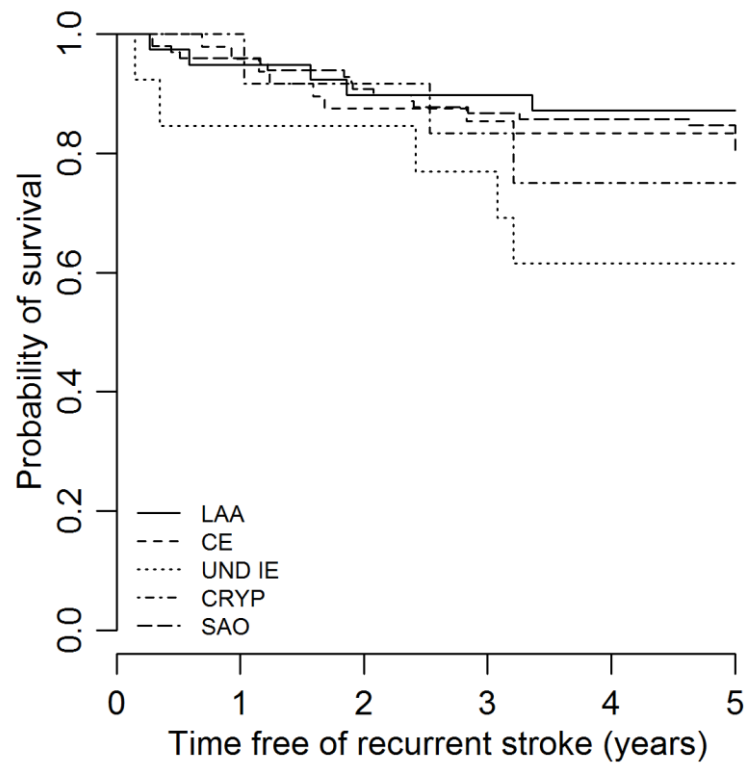

Figure S2 Kaplan-Meier survival curve showing the probability that, given survival, a patient with a ischemic stroke (IS) will remain free of a recurrent stroke, stratified by IS subtype (other determined IS not included).

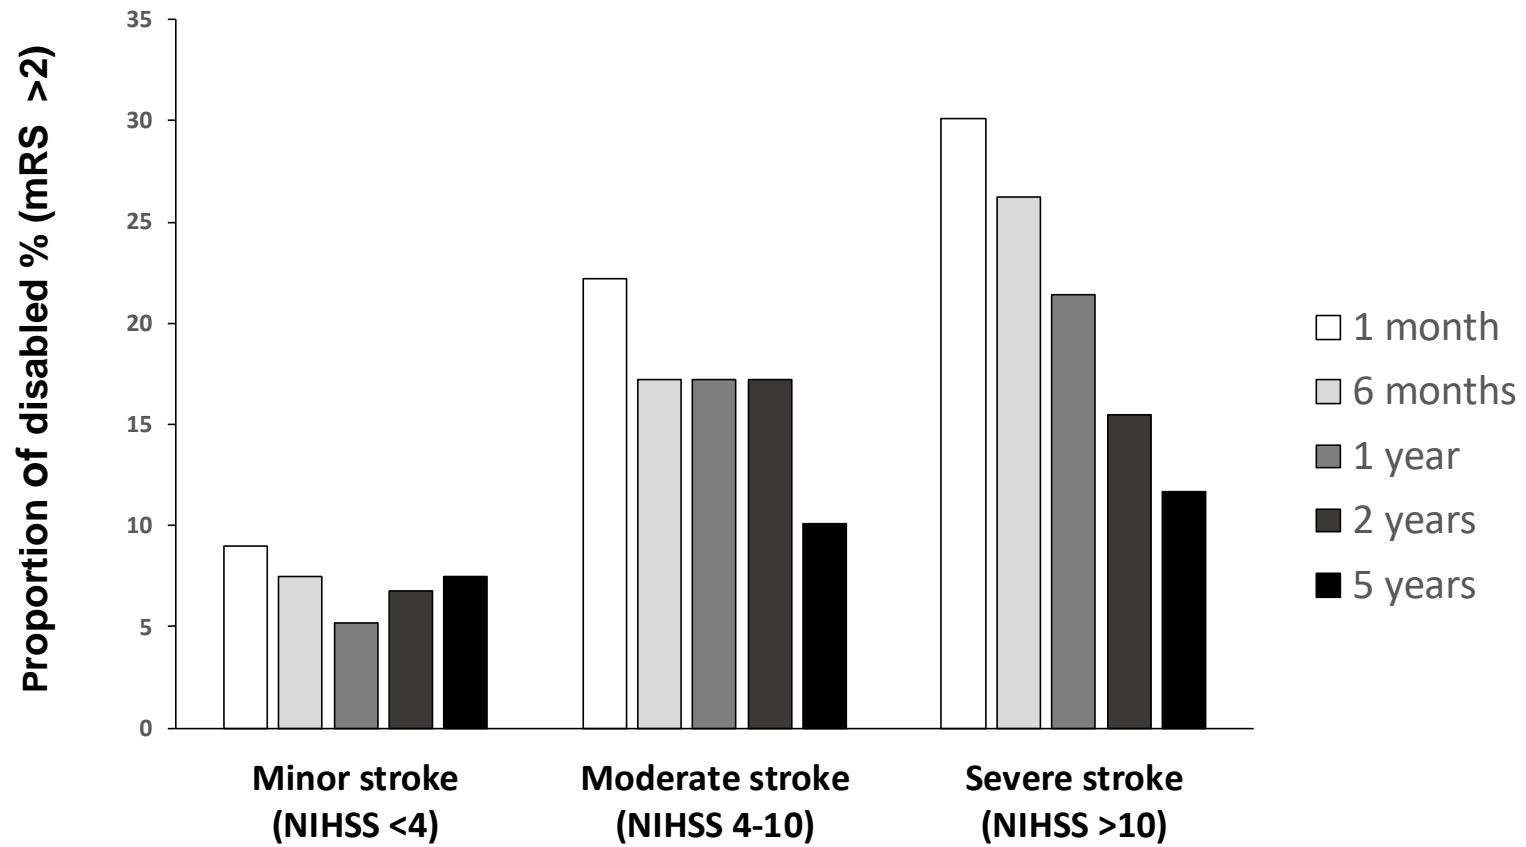

Figure S3. Rates of disability at follow-up by severity of index IS event.  
 NIHSS : National Institute of Health Stroke Scale.

**Table S2.** Regression model incorporating long-term survival with the Weibull method for ischemic stroke subtypes survival analysis\*

| Parameter     | Estimation | Standard error | 95% IC |        | p-value |
|---------------|------------|----------------|--------|--------|---------|
| Intercept     | 5.283      | 0.581          | 4.145  | 6.422  | <0.0001 |
| LAD           | -1.946     | 0.692          | -3.302 | -0.591 | 0.005   |
| CE            | -3.073     | 0.636          | -4.319 | -1.827 | <0.0001 |
| UND -II       | -4.905     | 0.718          | -6.312 | -3.499 | <0.0001 |
| CRYPT         | -1.022     | 1.252          | -3.475 | 1.431  | 0.414   |
| Scale         | 2.290      | 0.180          | 1.964  | 2.670  |         |
| Weibull Shape | 0.437      | 0.034          | 0.375  | 0.509  |         |

\* Weibull method using small artery disease ischemic stroke as a reference. LLD: large artery disease; CE: cardioembolic; UND: undetermined due to incomplete investigation; CRYP: cryptogenic

**Table S3.** Regression model incorporating long-term recurrence for ischemic stroke subtypes \*

| Parameter     | Estimation | Standard error | 95% IC |       | p-value  |
|---------------|------------|----------------|--------|-------|----------|
| Intercept     | 3.323      | 0.373          | 2.593  | 4.054 | < 0.0001 |
| LAD           | 0.474      | 0.564          | -0.632 | 1.579 | 0.401    |
| CE            | 0.151      | 0.470          | -0.770 | 1.072 | 0.748    |
| UND-II        | -0.945     | 0.575          | -2.072 | 0.182 | 0.100    |
| CRYPT         | -0.324     | 0.693          | -1.683 | 1.034 | 0.640    |
| Scale         | 1.113      | 0.171          | 0.825  | 1.503 |          |
| Weibull Shape | 0.898      | 0.138          | 0.665  | 1.213 |          |

\* Weibull method using small artery disease ischemic stroke as a reference. LLA: large artery disease; CE: cardioembolic; UND li: undetermined incomplete investigation; CRYP: cryptogenic
